# Supplementary material
Source: PubMed Central journal article supplement (PMC2084244)
Supplement: biophysj_107.108399_1.pdf [file biophysj_107.108399_1.pdf]

**Supplementary Material for  
the manuscript by Shinto *et al.***

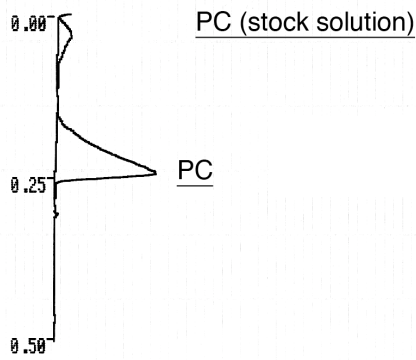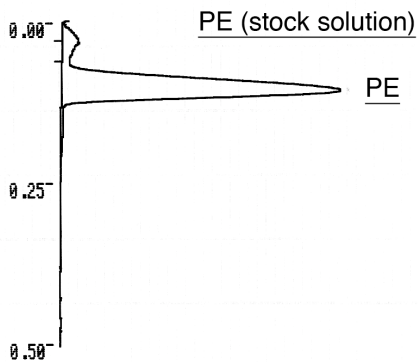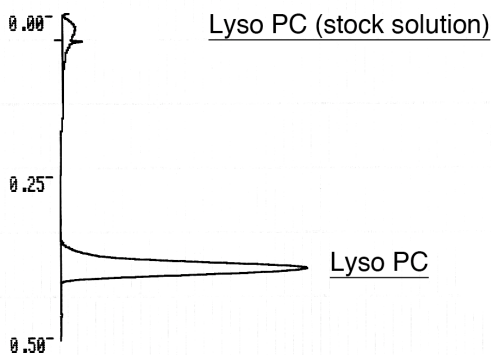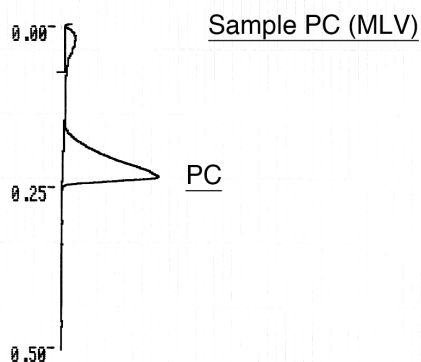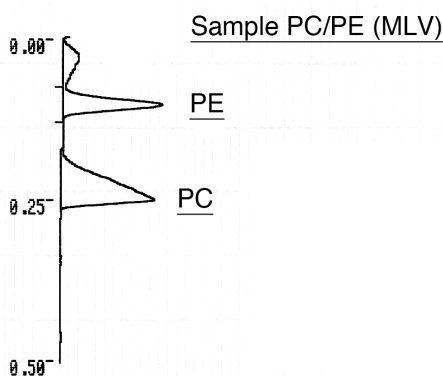

TLC data representing no lipid degradation during sample storage. Hydrated samples of PC and PC/PE (7:3) mixtures (ca. 50 wt % lipids) were prepared and stored at room temperature for 1 week. From the analysis of pure lipids (PC, PE, and lysoPC stock solutions), it was revealed that these lipids could be separated and identified. Small peak observed on the top of each profile corresponds to an elution-end of solvent. PC and PC/PE samples that were stored for 1 week showed peaks at the positions identical to those of corresponding stock solutions. Lyso compounds were not detected.
